# Supplementary material for: Development of a new electrochemical method for the determination of copper(ii) at trace levels in environmental and food samples
Source: Royal Society of Chemistry journal article supplement (doi:10.1039/d2ra06941e), 2022-01-01
Supplement: d2ra06941e1.pdf [file d2ra06941e1.pdf]

Supplementary information/data

Figures

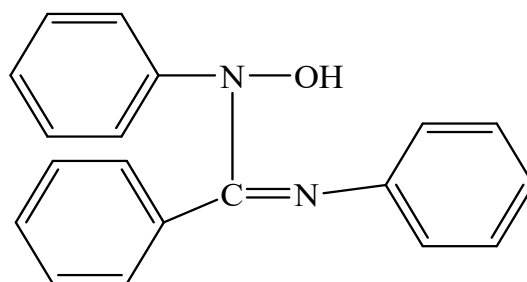

Fig. S1 Structure of N<sup>1</sup>-hydroxy-N<sup>1</sup>,N<sup>2</sup>-diphenylbenzamidine (HDPBA).<sup>27,28,34</sup>

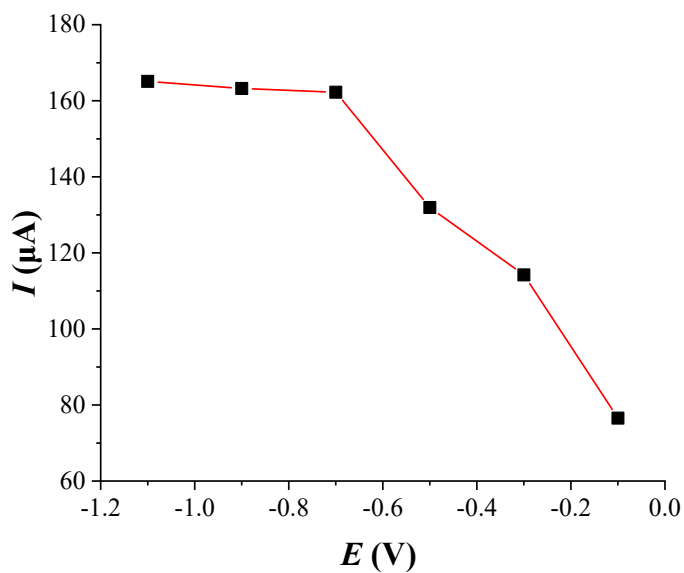

Fig. S2 Effect of accumulation potential on the voltammetric peak current of 1.500  $\mu\text{M}$  Cu(II). Supporting electrolyte solution: 0.1 M  $\text{NH}_4\text{Cl}$  (pH 5); accumulation time: 180 s; pulse amplitude: 100 mV; frequency: 60 Hz; step potential: 6 mV.

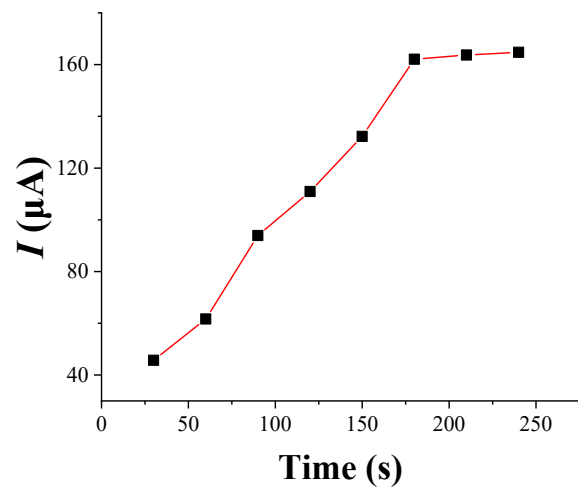

**Fig. S3** Effect of accumulation time on the voltammetric peak current of  $1.500 \mu\text{M Cu(II)}$ . Supporting electrolyte solution:  $0.1 \text{ M NH}_4\text{Cl}$  (pH 5); accumulation potential:  $-0.70 \text{ V}$ ; pulse amplitude:  $100 \text{ mV}$ ; frequency:  $60 \text{ Hz}$ ; step potential:  $6 \text{ mV}$ .
